# Supplementary material
Source: PubMed Central journal article supplement (PMC5584586)
Supplement: NIHMS894336-supplement-2.pdf [file NIHMS894336-supplement-2.pdf]

(a)

<sup>265</sup>DVSHED<sup>270</sup>

-LEE--  
 -LAE--  
 -L-Q--  
 --AED- (3)  
 --AE-- (2)  
 --AE-E  
 ---ED-  
 ---E--  
 --DD--  
 --DD-E  
 --QDD-  
 ---DD-  
 ---L-E

(b)

<sup>265</sup>DVSHED<sup>270</sup>

-LEE-- (10)  
 -LAE-- (2)  
 -LTE--  
 -L-E--  
 --AED-

(c)

<sup>326</sup>KALPAPIEK<sup>334</sup>

I-G-----  
 IYG-----  
 IDA-----  
 -GA-----  
 ---AE-E--  
 ---AY-E--  
 ----V-E-- (2)  
 ----SAE--  
 -----A-SS  
 -----S-QA  
 -----SE-A  
 -----SE-V (2)  
 -----E-V  
 -----T-V  
 -----Q-V  
 -----VQE

(d)

<sup>326</sup>KALPAPIEK<sup>334</sup>

VDA----- (4)  
 LDA----- (2)  
 IDA-----  
 IEA----- (2)  
 I-A-----  
 L-A-----  
 IDT-----  
 EGA-----  
 D-V-----  
 ---VM-E--  
 ---M-E--  
 ---L-E--  
 ---Q-E--  
 ---Y-E--  
 ----AEVA  
 ----AESV (2)  
 ----AE-V  
 ----AE-Q  
 ----SEVA  
 ----SE-V  
 -----E-- (3)  
 -----E-A (2)  
 -----ESA  
 -----EIA  
 -----E-V  
 -----EYS  
 -----HE
