# Supplementary material
Source: PubMed Central journal article supplement (PMC5584586)

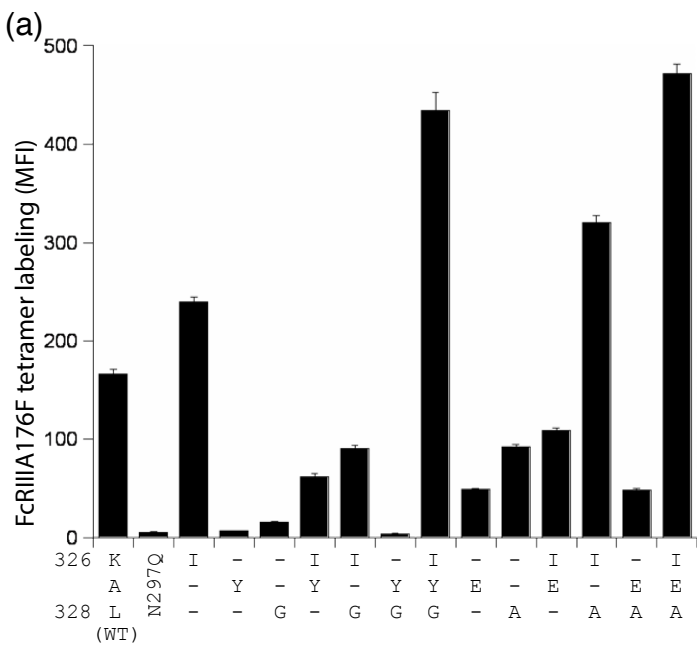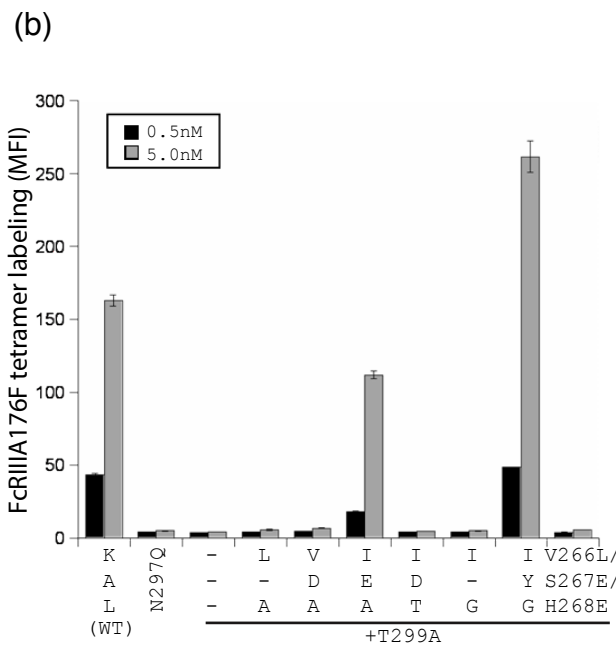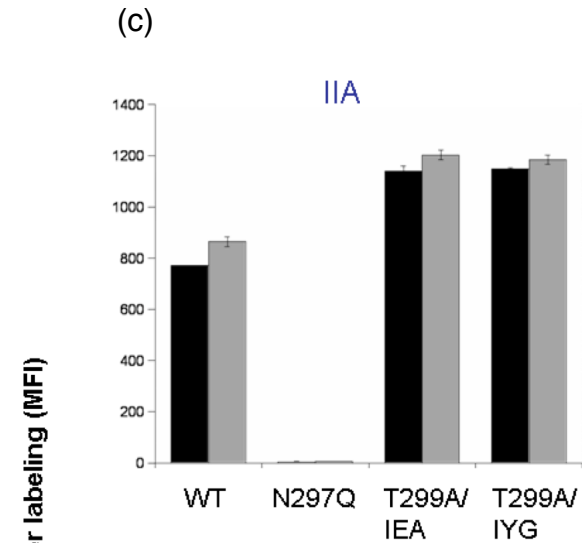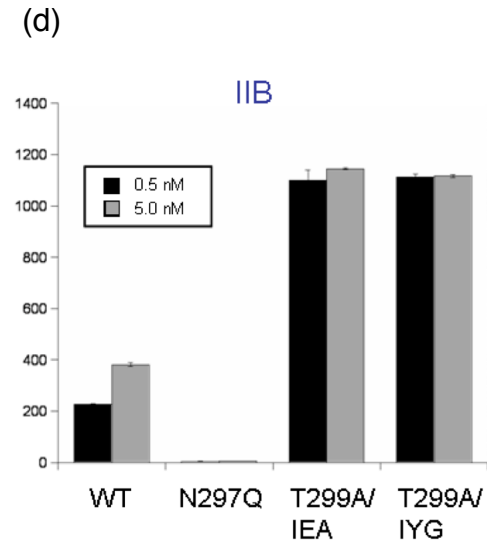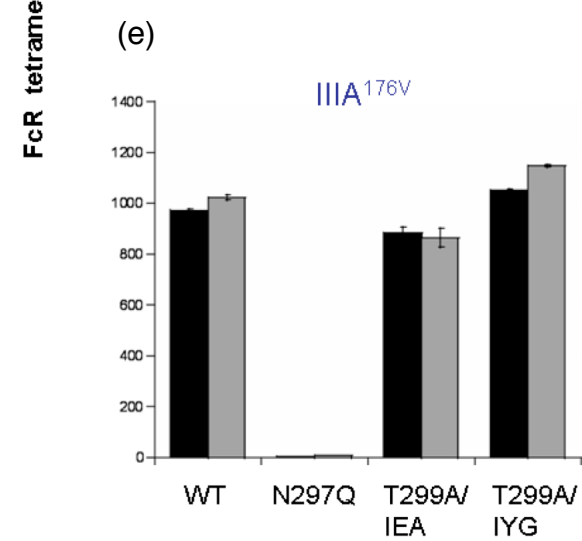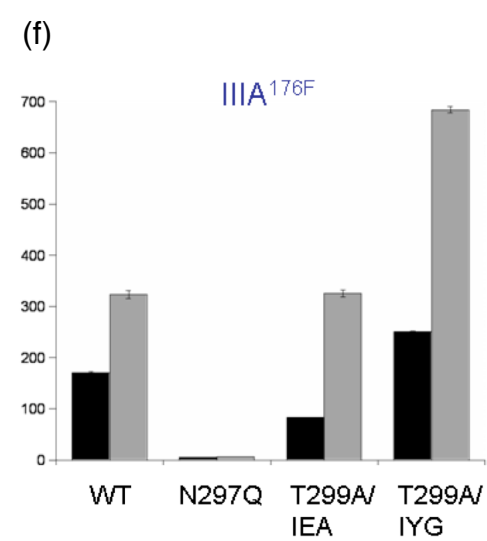

Supplement: NIHMS894336-supplement-3.pdf [file NIHMS894336-supplement-3.pdf]

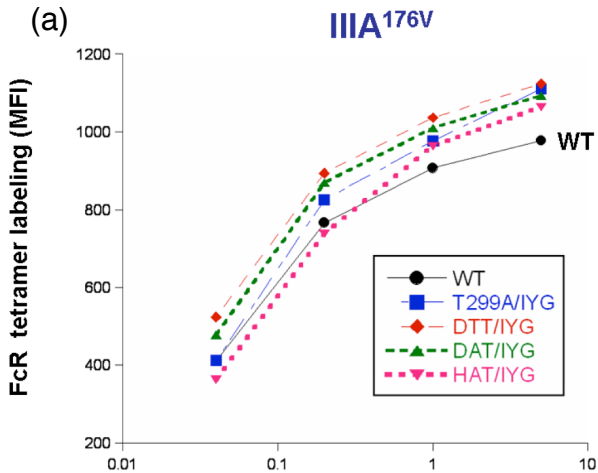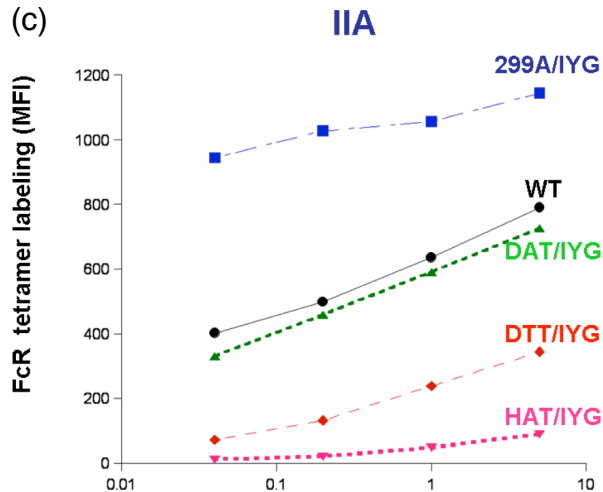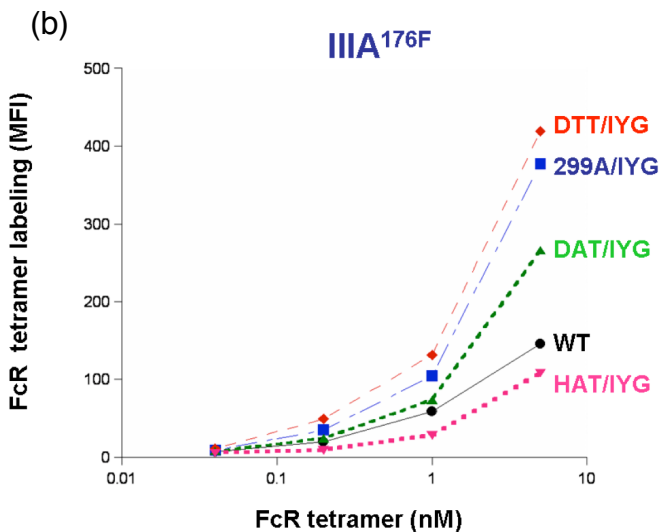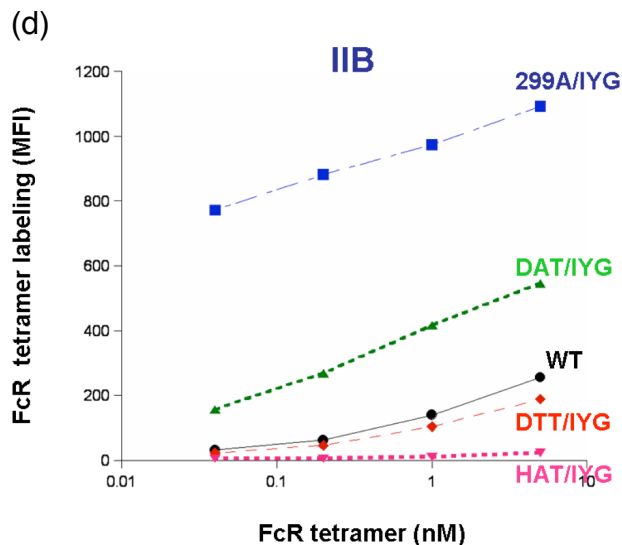

Supplement: NIHMS894336-supplement-4.pdf [file NIHMS894336-supplement-4.pdf]

## FcγRI

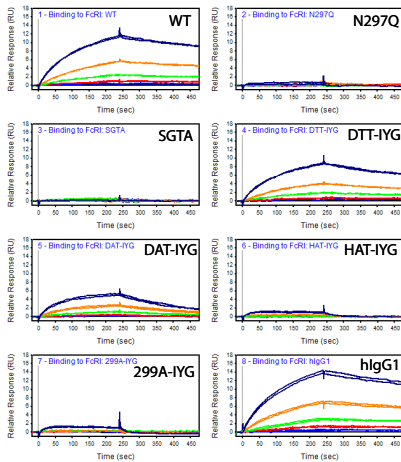

## FcγRIIA 167H

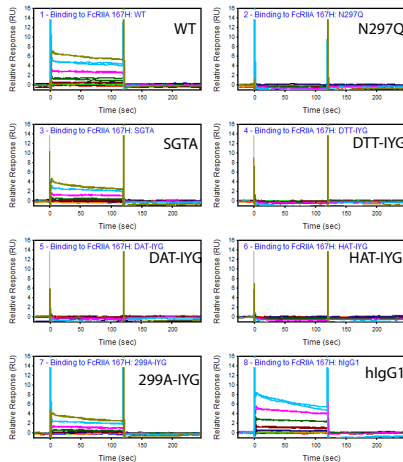

## FcγRIIA 167R

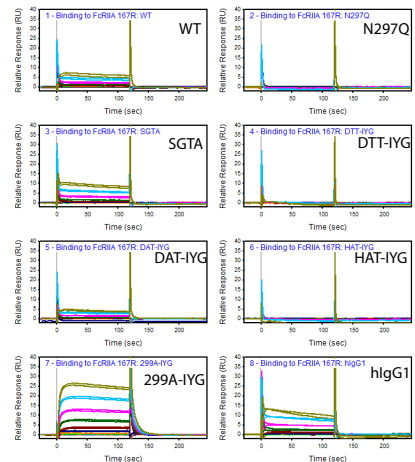

## FcγRIIB

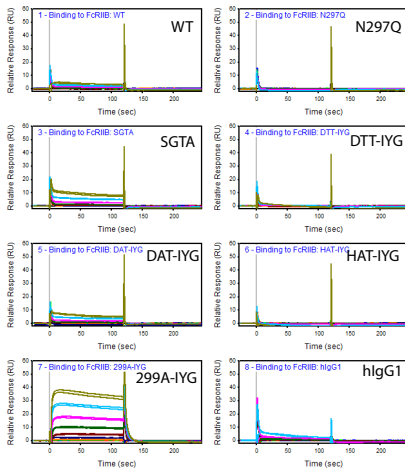

## FcγRIIA 176F

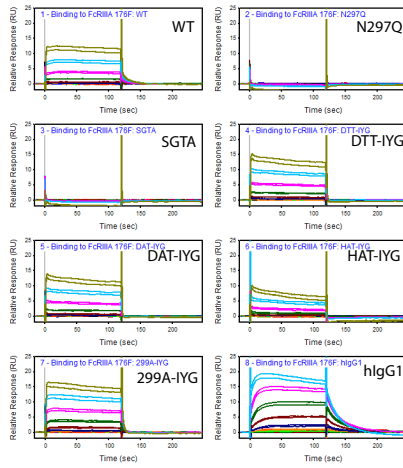

## FcγRIIA 176V

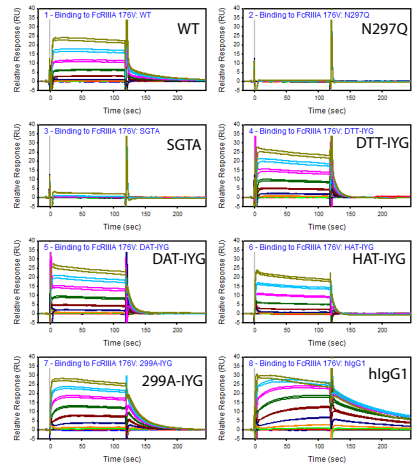

Supplement: NIHMS894336-supplement-5.pdf [file NIHMS894336-supplement-5.pdf]
